# Supplementary material
Source: Springer Nature journal article supplement (https://www.springermedizin.de/resource/supplementary/13037_2012_155_MOESM3_ESM.pdf/9659512)
Supplement: MOESM3 [file 9659512]

## 1. Assessment of preconditions

- Patient competence and voluntariness

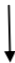

## 2. Provision of information

- Patient education
- Recommendation of a care plan
- Understanding of this information by the patient

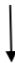

## 3. Stage of consent

- Patient consenting to the surgical procedure
- Recording of this authorization
